# Supplementary material
Source: publisher figshare collection journal article supplement (https://karger.figshare.com/ndownloader/files/13077887)

Trial period

Visit (V)

\*can be a phone visit

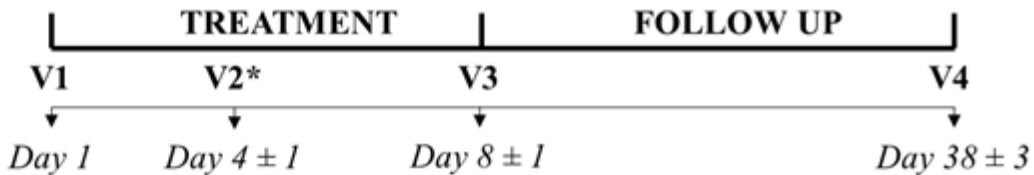

BNO 1045

BNO 1045

FT-placebo

FT

BNO 1045-placebo

FT

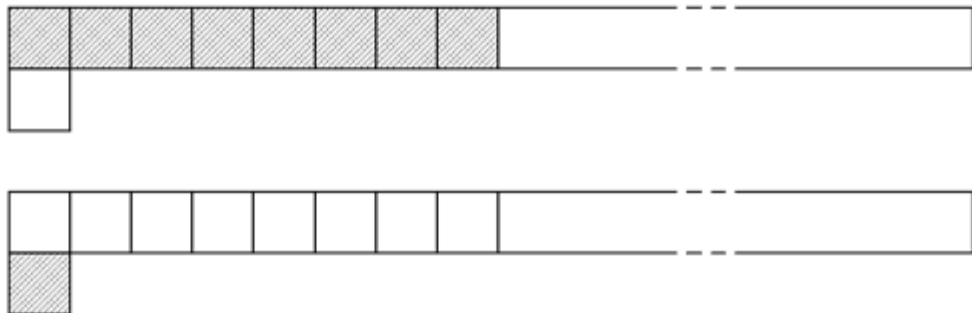

Supplement: Supplementary file 1 [file 13077887]
